# Supplementary material for: Parental Microbiota Modulates Offspring Development, Body Mass and Fecundity in a Polyphagous Fruit Fly
Source: PubMed Central journal article supplement (PMC7563405; doi:10.3390/microorganisms8091289), 2020-08-24
Supplement: microorganisms-08-01289-s001.pdf [file microorganisms-08-01289-s001.pdf]

Supplementary document for article:

# Parental microbiota modulates offspring development, body mass and fecundity in a polyphagous fruit fly

Binh Nguyen<sup>1</sup>, Anh Than<sup>1,2</sup>, Hue Dinh<sup>1</sup>, Juliano Morimoto<sup>1,3</sup>, Fleur Ponton<sup>1\*</sup>

<sup>1</sup>Department of Biological Sciences, Macquarie University, Sydney, NSW, Australia

<sup>2</sup>Department of Entomology, Vietnam National University of Agriculture, Trau Quy, Gia Lam Hanoi, Vietnam

<sup>3</sup>School of Biological Sciences, Zoology Building, Tillydrone Ave, Aberdeen AB24 2TZ, United Kingdom

\*Correspondence: fleur.ponton@mq.edu.au

Received: date; Accepted: date; Published: 24 August 2020

## Supplementary information 1

### *Culture-dependent method and PCR quantification to assess microbial status of parental axenic and control samples at egg, larval, and adult stages*

Samples were collected after egg washing, at third instar larvae, and at one-day-old adult. Eggs were pooled in groups of ca. 1500 eggs (100µL, N = 3) while larvae were collected in groups of 20 (N = 3) and adults were assessed individually (N = 3 males, 3 females). Larvae and adults were freeze-killed for 2h before subjecting to the surface sterilization by one wash for 3 min in 0.5% bleach (Peerless JAL®), followed by one wash in 70% ethanol for 1 min and three washes in sterile miliQ water. Egg, larval, and adult samples were then homogenated in 0.4, 0.1, and 1mL sterile PBS buffer, respectively and 25µL of each homogenate was plated on a petri dish contains 25 mL of either Luria Bertani agar (cat. no., 22700-025, Life technologies), or Man-Rogosa-Sharpe agar (cat. no., CM0361, Oxoid®), or Potato-Dextrose agar (cat. no., CM0139, Oxoid®) using single use L-shape spreaders (cat. no., Z723193, Sigma). LB dishes were incubated at 28°C for 24-48h, MRS and PDA dishes at 28°C for 48-72h. The number of colony-forming unit (CFU) on LB, MRS, PDA dishes was measured. The total CFU number per sample was then averaged between the 3 replicates for each medium (see Table S3).

The remained homogenates were subjected to PCR to quantified the amount of 16S rRNA gene (represents for the presence of bacteria) and the internal transcribed spacer (ITS, represents for the presence of fungi) with washing chemicals (bleach, ethanol, and sterile water, N = 3 replicates, N total = 9) used as negative control. The initial PCR amplicons were generated using AmpliTaq Gold 360 mastermix (Life Technologies, Australia). PCR conditions and primers were outlined in Table S2 below. A secondary PCR to index the amplicons was performed with TaKaRa Taq DNA Polymerase (Clontech). The resulting amplicons were measured by fluorometry (Invitrogen Picogreen) and normalised. The eqimolar pool was then measured by qPCR (KAPA). 16S rRNA and ITS concentrations (ng/µL) were then averaged between the 3 replicates (see Table S4).

Supplementary figures

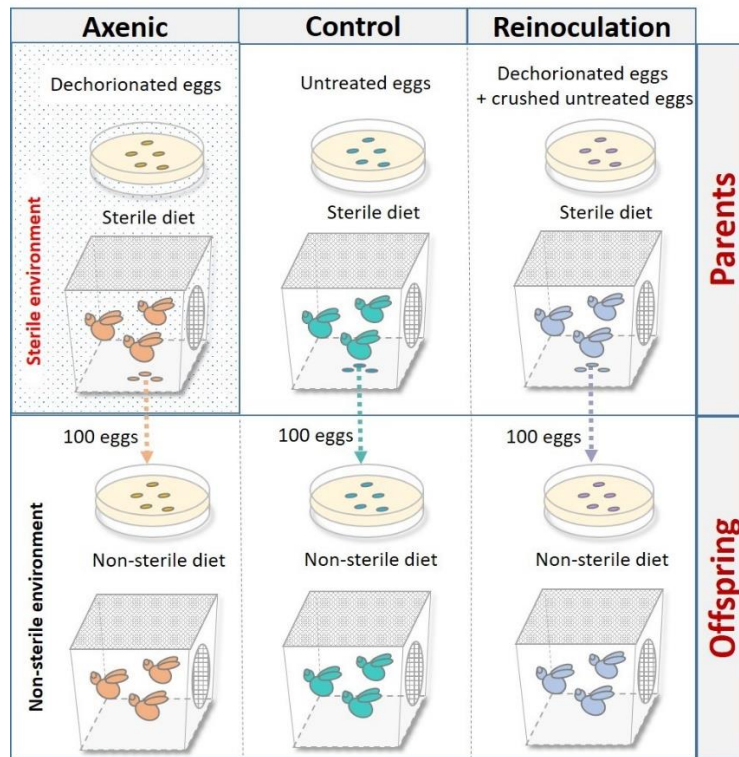

Figure S1 – Schematic representation of the experimental design

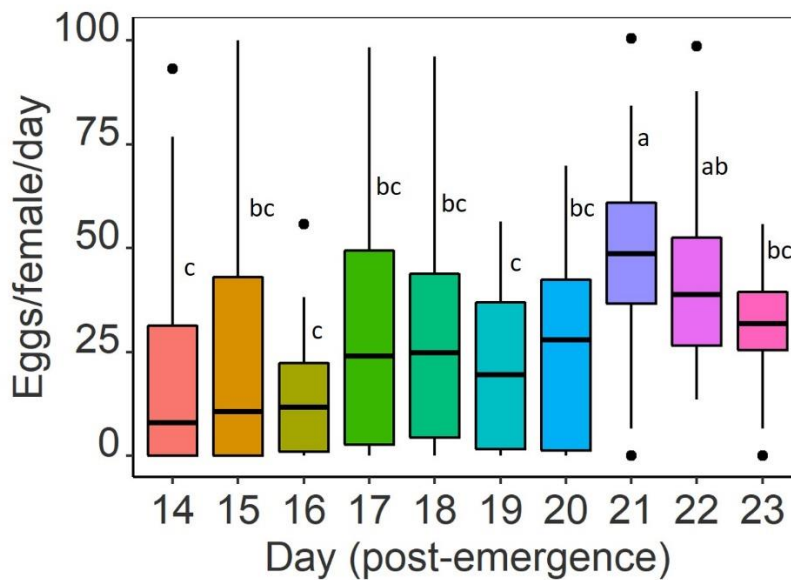

Figure S2. Effects of time on egg production in offspring. Different letters indicate a significant difference between the treatments (SNK post hoc test, p = 0.05)

## Supplementary tables

Table S1. Diet recipe (for 1000 mL) and suppliers [2]

| Ingredient          | Amount | Supplier                                |
|---------------------|--------|-----------------------------------------|
| Brewer's yeast (g)  | 204    | SF Health foods, Australia              |
| Sugar (g)           | 121.8  | Homebrand, Australia                    |
| Agar (g)            | 10     | MP Biomedicals                          |
| Citric Acid (g)     | 23     | Sigma, Australia                        |
| Nipagin (g)         | 2      | Southern Bio- logical, Australia        |
| Sodium Benzoate (g) | 2      | Sigma, Australia                        |
| Wheat Germ Oil (mL) | 2      | Melrose laboratories PTY LTD, Australia |
| MiliQ water (mL)    | 1000   | Lab source                              |

Table S2. PCR conditions and primer sequences

| PCR conditions   |                      |                |              |                       |              |                |
|------------------|----------------------|----------------|--------------|-----------------------|--------------|----------------|
| Target           | Cycle                | Initial        | Disassociate | Anneal                | Extension    | Finish         |
| 16S: V1- V3      | 29                   | 95°C for 7 min | 94°C for 45s | 50°C for 60S          | 72°C for 60S | 72°C for 7 min |
| ITS1F – ITS2     | 35                   | 95°C for 7 min | 94°C for 30s | 55°C for 45S          | 72°C for 60S | 72°C for 7 min |
| Primer sequences |                      |                |              |                       |              |                |
| Target           | 16S: V1- V3          |                |              | ITS1F – ITS2          |              |                |
| Forward          | AGAGTTTGATCMTGGCTCAG |                |              | CTGGTCATTTAGAGGAAGTAA |              |                |
| Reverse          | GWATTACCGCGGCKGCTG   |                |              | GCTGCGTTCTTCATCGATGC  |              |                |

**Table S3. Total CFU count per sample of parental axenic and control treatments was averaged between 3 replicates for each culture medium.**

| Treatment        | Stage            | Sex    | MRS<br>(average± SE) | LB<br>(average± SE) | PDA<br>(average± SE) |
|------------------|------------------|--------|----------------------|---------------------|----------------------|
| Parental control | Egg<br>(n=1500)  | -      | 687 (241)            | 3202 (450)          | 0 (0)                |
| Parental axenic  | Egg<br>(n=1500)  | -      | 0 (0)                | 0 (0)               | 0 (0)                |
| Parental control | Larval<br>(n=20) | -      | 11 (3)               | 16 (10)             | 8 (8)                |
| Parental axenic  | Larval<br>(n=20) | -      | 0 (0)                | 0 (0)               | 0 (0)                |
| Parental control | Adult<br>(n=1)   | Male   | 347 (307)            | 133 (133)           | 0 (0)                |
| Parental control | Adult<br>(n=1)   | Female | 960 (257)            | 1472 (658)          | 93 (93)              |
| Parental axenic  | Adult<br>(n=1)   | Male   | 0 (0)                | 0 (0)               | 0 (0)                |
| Parental axenic  | Adult<br>(n=1)   | Female | 0 (0)                | 0 (0)               | 0 (0)                |

**Table S4. 16S rRNA and ITS concentration (ng/ $\mu$ L) for 3 replicates of parental axenic and control treatments and washing chemicals.**

| Treatment        | Stage            | Sex    | 16S rRNA<br>(average $\pm$ SE) | ITS<br>(average $\pm$ SE) |
|------------------|------------------|--------|--------------------------------|---------------------------|
| Parental control | Egg<br>(n=1500)  | -      | 8.56 (1.89)                    | 0 (0)                     |
| Parental axenic  | Egg<br>(n=1500)  | -      | 0 (0)                          | 0 (0)                     |
| Parental control | Larval<br>(n=20) | -      | 0.12 (0.06)                    | 0.08 (0.08)               |
| Parental axenic  | Larval<br>(n=20) | -      | 0 (0)                          | 0 (0)                     |
| Parental control | Adult<br>(n=1)   | Male   | 1.22 (0.43)                    | 0 (0)                     |
| Parental control | Adult<br>(n=1)   | Female | 2.92 (1.65)                    | 0.07 (0.07)               |
| Parental axenic  | Adult<br>(n=1)   | Male   | 0 (0)                          | 0 (0)                     |
| Parental axenic  | Adult<br>(n=1)   | Female | 0 (0)                          | 0 (0)                     |
| 0.5% bleach      | -                | -      | 0 (0)                          | 0 (0)                     |
| 70% ethanol      | -                | -      | 0 (0)                          | 0 (0)                     |
| MiliQ water      | -                | -      | 0 (0)                          | 0 (0)                     |

**Table S5. Mean ( $\pm$  SE) of egg hatching success and developmental time of parental flies**

| Treatment              | n  | Egg hatching (%) | Developmental time (day) |
|------------------------|----|------------------|--------------------------|
| Parental axenic        | 10 | 90.4 (0.37)      | 17.44 (0.04)             |
| Parental control       | 10 | 89.7 (0.97)      | 17.41 (0.05)             |
| Parental reinoculation | 10 | 88.5 (0.9)       | 17.44 (0.04)             |

## References

1. Koyle ML, Veloz M, Judd AM, Wong AC-N, Newell PD, Douglas AE, Chaston JM. 2016 Rearing the Fruit Fly *Drosophila melanogaster* Under Axenic and Gnotobiotic Conditions. *J. Vis. Exp.* , 1–8. (doi:10.3791/54219)
2. Moadeli T, Taylor PW, Ponton F. 2017 High productivity gel diets for rearing of Queensland fruit fly, *Bactrocera tryoni*. *J. Pest Sci. (2004)*. **90**, 507–520. (doi:10.1007/s10340-016-0813-0)

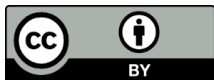

© 2019 by the authors. Licensee MDPI, Basel, Switzerland. This article is an open access article distributed under the terms and conditions of the Creative Commons Attribution (CC BY) license (<http://creativecommons.org/licenses/by/4.0/>).
